# Supplementary material
Source: PubMed Central journal article supplement (PMC2943981)
Supplement: NIHMS223557-supplement-Table.pdf [file NIHMS223557-supplement-Table.pdf]

Table S1

NK cell receptor repertoire in NK cells from *Dicer*<sup>Δ/+</sup>, *Dicer*<sup>Δ/Δ</sup>, *Dgcr8*<sup>Δ/+</sup>, and *Dgcr8*<sup>Δ/Δ</sup> mice.

|         | <b><i>Dicer</i><sup>Δ/+</sup></b> | <b><i>Dicer</i><sup>Δ/Δ</sup></b> | <b><i>Dgcr8</i><sup>Δ/+</sup></b> | <b><i>Dgcr8</i><sup>Δ/Δ</sup></b> |
|---------|-----------------------------------|-----------------------------------|-----------------------------------|-----------------------------------|
| Ly49H   | 43.9±4.9                          | 44.2±2.1                          | 50.6±3.1                          | 42.4±3.3                          |
| Ly49D   | 43.0±6.2                          | 43.4±5.1                          | 47.9±3.9                          | 42.1±1.6                          |
| CD94    | 50.3±2.8                          | 55.1±4                            | 48.9±1.2                          | 48.8±3.0                          |
| Ly49G2  | 40.9±2.8                          | 36.4±2.6                          | 44.8±1.8                          | 38.8±2.6                          |
| Ly49C/I | 44.6±1.9                          | 47.2±3.1                          | 47.6±3.5                          | 45.5±6.1                          |
| Ly49A   | 6.8±1.7                           | 7.5±1.4                           | 8.0±1.0                           | 9.5±1.5                           |

Table S2

List of miRNAs expressed in mouse (NK1.1<sup>+</sup>TCRβ<sup>-</sup>) and human (CD56<sup>+</sup>CD3<sup>-</sup>) NK cells, arranged from the highest to lowest expression level.

| Mouse                              | Human                              |
|------------------------------------|------------------------------------|
| mmu-miR-690                        | hsa-mir-487                        |
| mmu-miR-709                        | dre-miR-739                        |
| hsa/mmu-mir-150                    | hsa/mmu-mir-150                    |
| dre-miR-739                        | hsa-miR-768-3p                     |
| hsa/mmu/dre-mir-23b                | hsa/mmu/dre-let-7f                 |
| hsa/mmu-mir-142-5p;dre-mir-142a-5p | dre-mir-16b                        |
| hsa/mmu-mir-29a                    | hsa/mmu/dre-mir-23b                |
| hsa/mmu/dre-mir-23a                | hsa/mmu/dre-mir-23a                |
| hsa/mmu-mir-16                     | hsa/mmulet-7g                      |
| hsa/mmu-mir-21                     | hsa/mmu/dre-mir-103                |
| dre-mir-16b                        | hsa/mmu/dre-let-7a                 |
| hsa/mmu/dre-let-7a                 | dre-mir-16a                        |
| dre-mir-16a                        | hsa/mmu/dre-mir-26a                |
| hsa/mmu/dre-let-7f                 | hsa/mmu/dre-mir-24                 |
| hsa/mmu/dre-mir-24                 | dre-mir-26b                        |
| hsa/mmu-mir-15b                    | hsa/mmu-mir-29a                    |
| dre-mir-26b                        | hsa/mmu-mir-16                     |
| mmu-miR-720                        | hsa-miR-768-5p                     |
| hsa/mmu-let-7g                     | hsa/mmu-mir-26b                    |
| dre-mir-29a                        | hsa/mmu-mir-15b                    |
| dre-mir-150                        | hsa/mmu/dre-let-7c                 |
| mmu-mir-140                        | hsa/mmu/dre-mir-107                |
| hsa/mmu/dre-mir-103                | hsa/mmu-mir-21                     |
| dre-mir-15b                        | mmu-miR-720                        |
| hsa/mmu/dre-mir-30d                | hsa/mmu/dre-mir-223                |
| hsa/mmu/dre-mir-26a                | hsa/mmu-mir-142-5p;dre-mir-142a-5p |
| hsa/mmu-mir-29c;dre-mir-29a3       | hsa-miR-638                        |
| hsa/mmu/dre-mir-30b                | dre-mir-29a                        |
| hsa/mmu/dre-mir-29b                | dre-mir-150                        |
| hsa/mmu-mir-191                    | hsa/mmu/dre-mir-181a               |
| hsa/mmu/dre-mir-107                | hsa/mmulet-7d                      |
| hsa/mmulet-7d                      | hsa/mmu-mir-29c;dre-mir-29a3       |
| hsa/mmu/dre-let-7i                 | hsa/mmu-mir-146b                   |
| mmu-miR-805                        | hsa/mmu-mir-142-3p;dre-mir-142a-3p |
| hsa/mmu/dre-mir-10a                | hsa/mmu/dre-mir-27a                |
| hsa/mmu/dre-let-7c                 | hsa/mmu/dre-mir-221                |
| hsa/mmu/dre-let-7b                 | hsa/mmu/dre-mir-30b                |
| hsa/mmu/dre-mir-25                 | hsa/mmu/dre-mir-29b                |
| hsa/mmu-mir-106b                   | hsa/mmu-mir-28                     |
| hsa/mmu-mir-15a                    | hsa/mmu-mir-494                    |

|                                                                                                                                                                                                                                                                                                                                                                                                                                                                                                                                                                                                                                                                                                                                                                                                                                                                                                           |                                                                                                                                                                                                                                                                                                                                                                                                                                                                                                                                                                                                                                                                                                                                                                                                                                                                                                               |
|-----------------------------------------------------------------------------------------------------------------------------------------------------------------------------------------------------------------------------------------------------------------------------------------------------------------------------------------------------------------------------------------------------------------------------------------------------------------------------------------------------------------------------------------------------------------------------------------------------------------------------------------------------------------------------------------------------------------------------------------------------------------------------------------------------------------------------------------------------------------------------------------------------------|---------------------------------------------------------------------------------------------------------------------------------------------------------------------------------------------------------------------------------------------------------------------------------------------------------------------------------------------------------------------------------------------------------------------------------------------------------------------------------------------------------------------------------------------------------------------------------------------------------------------------------------------------------------------------------------------------------------------------------------------------------------------------------------------------------------------------------------------------------------------------------------------------------------|
| mmu-mir-433-5p<br>hsa-mir-146a;mmu-mir-146<br>hsa/mmu-mir-93<br>hsa/mmu/dre-mir-30c<br>hsa/mmu/dre-mir-221<br>hsa/mmu/dre-mir-27a<br>hsa/mmu-mir-142-3p;dre-mir-142a-3p<br>hsa/mmu-mir-26b<br>hsa/mmu-mir-130b<br>hsa/mmu/dre-mir-20a<br>mmu-mir-106a<br>hsa/mmu/dre-mir-181a<br>dre-let-7g<br>hsa/mmu/dre-mir-19b<br>hsa/mmu-mir-195<br>dre-mir-93<br>hsa/mmu-mir-17-5p;dre-mir-17a<br>dre-mir-19c<br>dre-mir-457a<br>hsa/mmu-mir-106a;hsa/mmu-mir-17-5p<br>dre-mir-20b<br>mmu-miR-467b<br>mmu-miR-691<br>dre-let-7d<br>dre-mir-130b<br>dre-mir-19d<br>hsa/mmu-let-7e<br>hsa/mmu-mir-139<br>dre-let-7e<br>dre-let-7j<br>mmu-miR-762<br>hsa/mmu-miR-181c<br>hsa/mmu-mir-494<br>mmu-miR-689<br>hsa-miR-765<br>hsa/mmu-mir-20b<br>mmu-mir-467<br>hsa/mmu-mir-342<br>hsa-miR-425-5p<br>dre-mir-22b<br>dre-mir-30a<br>hsa/dre-mir-92b<br>hsa-miR-638<br>hsa/mmu-mir-185<br>hsa/mmu-mir-652<br>hsa/mmu-mir-361 | hsa/mmu/dre-mir-19b<br>hsa-miR-675<br>hsa/mmu/dre-mir-363<br>dre-let-7g<br>hsa/mmu/dre-mir-222<br>hsa/mmu-mir-17-5p;dre-mir-17a<br>dre-let-7j<br>mmu-mir-140<br>hsa/mmu/dre-mir-20a<br>hsa-mir-146a;mmu-mir-146<br>dre-let-7e<br>dre-mir-19c<br>hsa/mmu-mir-342<br>dre-mir-15b<br>hsa/mmu/dre-let-7b<br>dre-mir-22b<br>mmu-mir-106a<br>hsa/mmu-mir-191<br>hsa/mmu-mir-20b<br>hsa/mmulet-7e<br>hsa/mmu-mir-106b<br>hsa-mir-518f<br>hsa-mir-101;mmu/dre-mir-101a<br>hsa/mmu/dre-mir-25<br>hsa/mmu-mir-195<br>hsa/mmu-mir-15a<br>hsa/mmu-mir-93<br>mmu-miR-709<br>dre-mir-457a<br>mmu-miR-714<br>hsa/mmu-mir-22<br>dre-miR-27e<br>dre-mir-20b<br>hsa/mmu-mir-106a;hsa/mmu-mir-17-5p<br>hsa/mmu/dre-mir-27b<br>hsa-miR-565<br>hsa/mmu/dre-mir-30d<br>dre-mir-27d<br>hsa/mmu/dre-let-7i<br>hsa/mmu/dre-mir-181a<br>hsa-miR-663<br>hsa/mmu-mir-185<br>hsa/mmu-mir-320<br>mmu-miR-762<br>mmu-miR-711<br>dre-mir-181c |
|-----------------------------------------------------------------------------------------------------------------------------------------------------------------------------------------------------------------------------------------------------------------------------------------------------------------------------------------------------------------------------------------------------------------------------------------------------------------------------------------------------------------------------------------------------------------------------------------------------------------------------------------------------------------------------------------------------------------------------------------------------------------------------------------------------------------------------------------------------------------------------------------------------------|---------------------------------------------------------------------------------------------------------------------------------------------------------------------------------------------------------------------------------------------------------------------------------------------------------------------------------------------------------------------------------------------------------------------------------------------------------------------------------------------------------------------------------------------------------------------------------------------------------------------------------------------------------------------------------------------------------------------------------------------------------------------------------------------------------------------------------------------------------------------------------------------------------------|

|                                                                                                                                                                                                                                                                                                                                                                                                                                                                                                                                                                                                                                                                                                                                                                                                                                                                                                                                    |                                                                                                                                                                                                                                                                                                                                                                                                                                                                                                                                                                                                                                                                                                                                                                                                                                                                                                                                                                                |
|------------------------------------------------------------------------------------------------------------------------------------------------------------------------------------------------------------------------------------------------------------------------------------------------------------------------------------------------------------------------------------------------------------------------------------------------------------------------------------------------------------------------------------------------------------------------------------------------------------------------------------------------------------------------------------------------------------------------------------------------------------------------------------------------------------------------------------------------------------------------------------------------------------------------------------|--------------------------------------------------------------------------------------------------------------------------------------------------------------------------------------------------------------------------------------------------------------------------------------------------------------------------------------------------------------------------------------------------------------------------------------------------------------------------------------------------------------------------------------------------------------------------------------------------------------------------------------------------------------------------------------------------------------------------------------------------------------------------------------------------------------------------------------------------------------------------------------------------------------------------------------------------------------------------------|
| <p> hsa/dre-miR-92b<br/> mmu-mir-17-3p<br/> hsa/mmu/dre-mir-30e-5p<br/> hsa/dre-mir-92b<br/> dre-mir-27d<br/> mmu-miR-674<br/> mmu-miR-669c<br/> hsa-miR-766<br/> dre-mir-21<br/> hsa/mmu/dre-mir-222<br/> dre-miR-27e<br/> hsa/mmu-mir-423<br/> hsa/mmu/dre-mir-27b<br/> hsa-miR-768-5p<br/> hsa/mmu/dre-mir-130a<br/> mmu-mir-350<br/> hsa/dre-mir-10b<br/> mmu-miR-711<br/> hsa/mmu-mir-28<br/> mmu-miR-374-5p<br/> hsa-mir-508<br/> hsa/mmu-mir-98<br/> hsa/mmu-mir-484<br/> dre-mir-10c<br/> hsa/mmu-mir-30a-5p<br/> hsa-mir-181c<br/> hsa-mir-382<br/> hsa/mmu-mir-22<br/> mmu-miR-685<br/> hsa-mir-422a<br/> mmu-miR-702<br/> mmu-mir-424<br/> mmu-mir-500<br/> hsa/mmu-mir-149<br/> hsa-miR-572<br/> hsa-mir-101;mmu/dre-mir-101a<br/> hsa-mir-18b<br/> mmu-mir-466<br/> hsa/mmu/dre-mir-194<br/> hsa/mmu/dre-mir-140<br/> hsa/mmu/dre-mir-92<br/> hsa-miR-640<br/> hsa/mmu-mir-320<br/> dre-mir-22a<br/> mmu-miR-761 </p> | <p> hsa/mmu-mir-361<br/> dre-mir-19d<br/> hsa-miR-425-5p<br/> hsa/mmu/dre-mir-30c<br/> hsa/mmu/dre-mir-130a<br/> hsa/mmu/dre-mir-30e-5p<br/> hsa/mmu/dre-mir-181b<br/> hsa/mmu-miR-181c<br/> hsa/mmu/dre-mir-92<br/> dre-mir-93<br/> hsa/mmu-mir-130b<br/> dre-mir-130c<br/> hsa/mmu-mir-181d<br/> mmu-miR-675-5p<br/> hsa/dre-mir-155<br/> hsa/mmu/dre-mir-194<br/> mmu-mir-465-5<br/> hsa/dre-mir-92b<br/> hsa-mir-373<br/> hsa/mmu-mir-423<br/> dre-mir-457b<br/> mmu-mir-467<br/> mmu-miR-374-5p<br/> hsa/mmu-128a;dre-mir-128<br/> hsa-mir-372<br/> hsa/mmu-mir-484<br/> hsa-miR-557<br/> dre-mir-30a<br/> hsa-mir-181c<br/> hsa/mmu-mir-203<br/> mmu-miR-702<br/> hsa/mmu-mir-135b<br/> hsa/mmu/dre-mir-7a<br/> hsa/dre-miR-92b<br/> hsa/mmu-mir-324-3p<br/> dre-mir-130b<br/> hsa/dre-mir-92b<br/> hsa-miR-765<br/> mmu-miR-467b<br/> dre-mir-21<br/> hsa-mir-17-3p<br/> mmu-mir-17-3p<br/> dre-miR-735<br/> hsa-miR-625<br/> hsa/mmu/dre-mir-19a<br/> hsa-mir-421 </p> |
|------------------------------------------------------------------------------------------------------------------------------------------------------------------------------------------------------------------------------------------------------------------------------------------------------------------------------------------------------------------------------------------------------------------------------------------------------------------------------------------------------------------------------------------------------------------------------------------------------------------------------------------------------------------------------------------------------------------------------------------------------------------------------------------------------------------------------------------------------------------------------------------------------------------------------------|--------------------------------------------------------------------------------------------------------------------------------------------------------------------------------------------------------------------------------------------------------------------------------------------------------------------------------------------------------------------------------------------------------------------------------------------------------------------------------------------------------------------------------------------------------------------------------------------------------------------------------------------------------------------------------------------------------------------------------------------------------------------------------------------------------------------------------------------------------------------------------------------------------------------------------------------------------------------------------|

|                                                                                                                                                                                                                                                                                                                                                                                                                                                                                                                                                                                                                                                                                                                                                                                                                                                                                                                                                                                    |                                                                                                             |
|------------------------------------------------------------------------------------------------------------------------------------------------------------------------------------------------------------------------------------------------------------------------------------------------------------------------------------------------------------------------------------------------------------------------------------------------------------------------------------------------------------------------------------------------------------------------------------------------------------------------------------------------------------------------------------------------------------------------------------------------------------------------------------------------------------------------------------------------------------------------------------------------------------------------------------------------------------------------------------|-------------------------------------------------------------------------------------------------------------|
| <p> hsa-miR-663<br/> hsa/mmu-mir-181d<br/> mmu-mir-465-5p<br/> hsa-miR-636<br/> mmu-miR-703<br/> hsa/dre-mir-18a;mmu-mir-18<br/> hsa/mmu-mir-422b<br/> dre-mir-457b<br/> hsa/mmu/dre-mir-365<br/> hsa-mir-17-3p<br/> hsa/mmu-miR-532<br/> hsa/mmu/dre-mir-7a<br/> hsa/mmu/dre-mir-19a<br/> hsa-miR-589<br/> hsa/mmu-miR-296<br/> hsa/mmu/dre-mir-200b<br/> mmu-mir-101b<br/> mmu-mir-345<br/> dre-mir-142b-5p<br/> hsa-mir-421<br/> hsa/mmu-mir-30e-3p<br/> hsa-miR-634<br/> mmu-mir-501<br/> mmu-mir-155<br/> dre-miR-737<br/> hsa-miR-606<br/> hsa/mmu-mir-146b<br/> mmu-mir-674<br/> mmu-miR-712<br/> hsa/dre-mir-155<br/> dre-miR-735<br/> mmu-miR-301b<br/> hsa-miR-620<br/> hsa/mmu/dre-mir-363<br/> hsa-miR-559<br/> hsa/mmu-mir-301&amp;dre-mir-301a<br/> hsa/mmu/dre-mir-182<br/> mmu-mir-667<br/> hsa-miR-627<br/> hsa/mmu-mir-335<br/> hsa/mmu-mir-802<br/> hsa/mmu-mir-148a<br/> hsa/mmu/dre-mir-1<br/> hsa/mmu/dre-mir-183<br/> hsa/mmu-mir-210<br/> dre-mir-210 </p> | <p> hsa/dre-mir-18a;mmu-mir-18<br/> hsa-mir-18b<br/> hsa-miR-620<br/> dre-mir-210<br/> hsa/mmu-mir-210 </p> |
|------------------------------------------------------------------------------------------------------------------------------------------------------------------------------------------------------------------------------------------------------------------------------------------------------------------------------------------------------------------------------------------------------------------------------------------------------------------------------------------------------------------------------------------------------------------------------------------------------------------------------------------------------------------------------------------------------------------------------------------------------------------------------------------------------------------------------------------------------------------------------------------------------------------------------------------------------------------------------------|-------------------------------------------------------------------------------------------------------------|

|                             |  |
|-----------------------------|--|
| hsa/dre-mir-193;mmu-mir-193 |  |
|-----------------------------|--|
